# Supplementary material
Source: publisher figshare collection journal article supplement (https://acs.figshare.com/ndownloader/files/3958222)
Supplement: Supplementary file 1 [file 3958222]

# Silver Nanowire Percolation Network Soldered with Graphene Oxide at Room Temperature and Its Application for Fully Stretchable Polymer Light-Emitting Diodes

Jiajie Liang,<sup>1,+</sup> Lu Li,<sup>1,+</sup> Kwing Tong,<sup>1</sup> Zhi Ren,<sup>1</sup> Wei Hu,<sup>1</sup> Xiaofan Niu,<sup>1</sup> Yongsheng Chen<sup>2</sup> and Qibing Pei<sup>\*,1</sup>

<sup>1</sup> Department of Materials Science and Engineering, Henry Samueli School of Engineering and Applied Science, University of California, Los Angeles, California 90095, USA. <sup>2</sup> Key Laboratory of Functional Polymer Materials and Centre of Nanoscale Science and Technology Institute of Polymer Chemistry College of Chemistry Nankai University 300071, Tianjin (China)

\*E-mail: [gpei@seas.ucla.edu](mailto:gpei@seas.ucla.edu) (Q.P.)

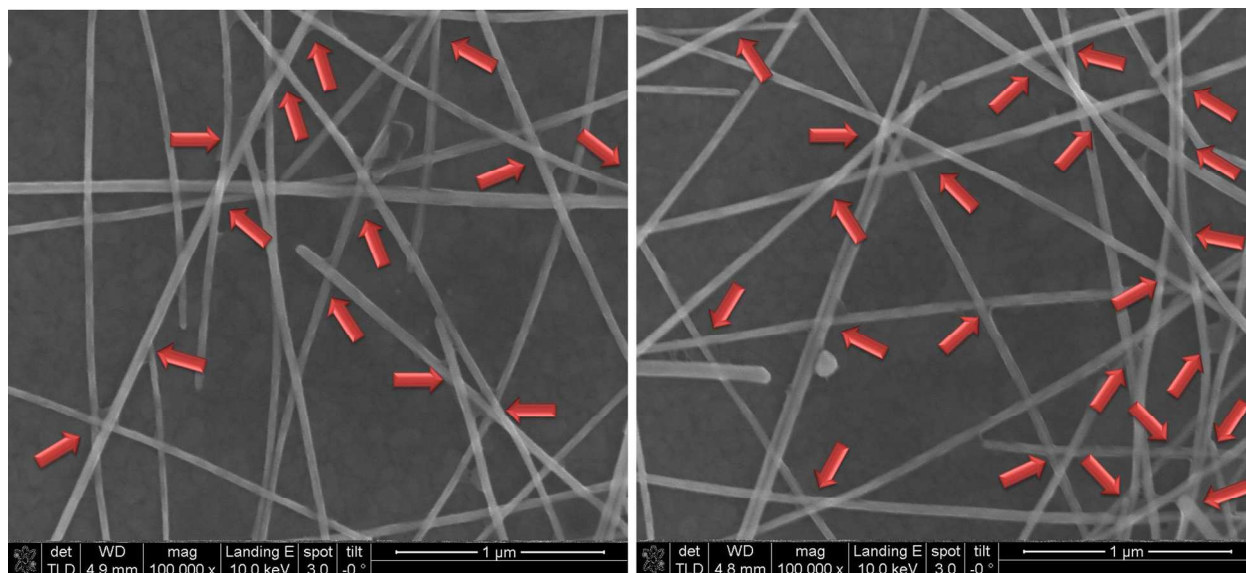

**Figure S1.** SEM images of AgNW junctions soldered by GO. Red arrows indicate GO soldered junctions.

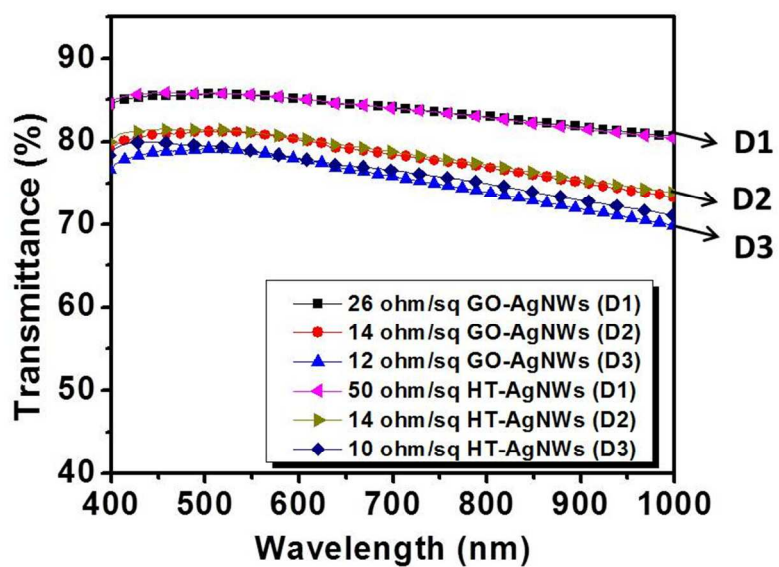

**Figure S2.** Transmittance spectra of GO-soldered AgNW networks and HT-annealed AgNW networks with three different AgNW densities (D1, D1 and D3). All transmittance data are inclusive of glass substrate.

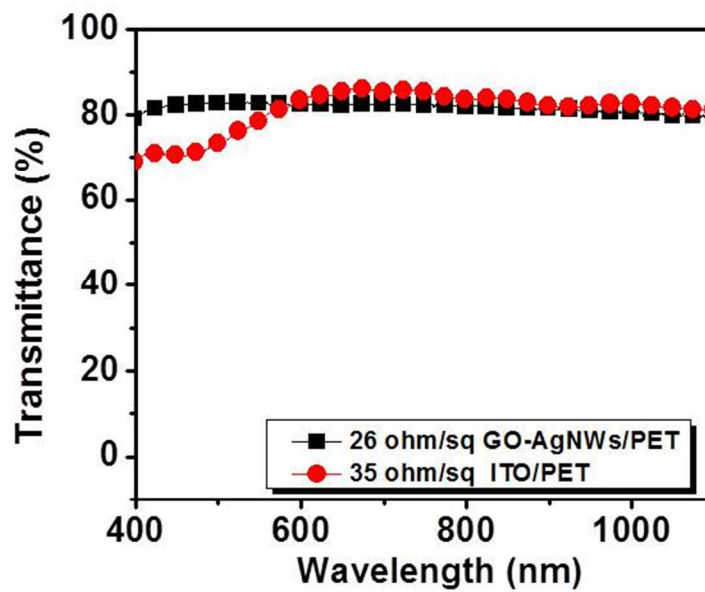

**Figure S3.** Transmittance spectra of the 26 ohm/sq GO-AgNW/PET as compared to a commercial ITO/PET film (35 ohm/sq) (transmittance data are inclusive of PET substrate).

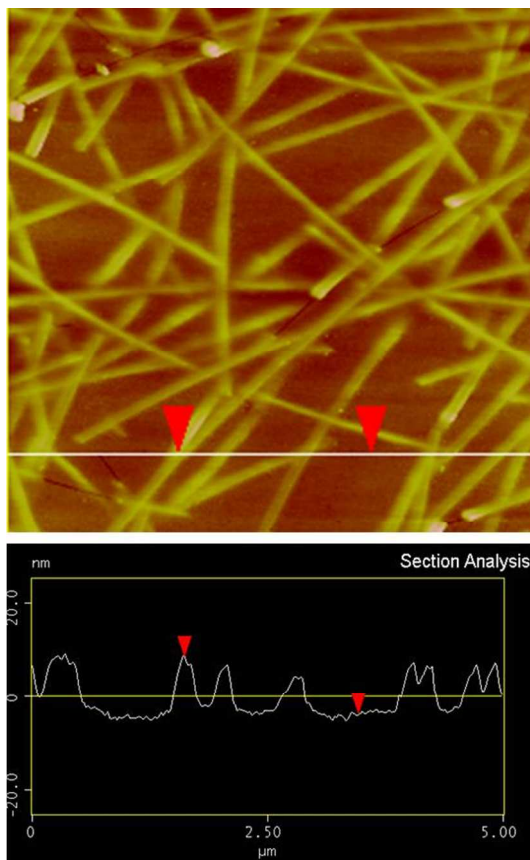

**Figure S4.** AFM images for 14 ohm/sq GO-AgNW-PUA composite electrode. The peak to valley value between the two red arrows is around 10 nm.

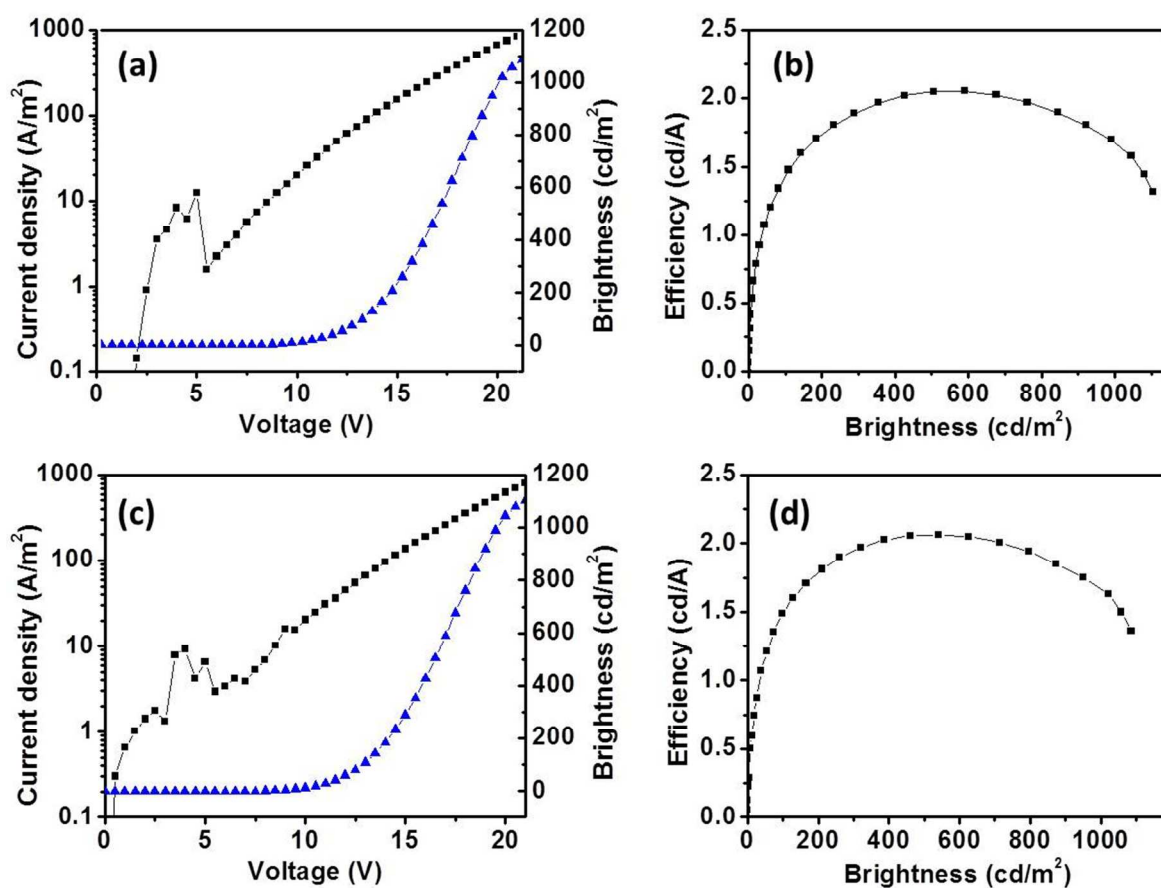

**Figure S5.** (a) Current density-luminance-driving voltage characteristics and (b) current efficiency-brightness characteristics of the stretchable PLED device measured from composite electrode anode side. (c) Current density-luminance-driving voltage characteristics and (d) current efficiency-brightness characteristics of the PLED device measured from composite electrode cathode side.

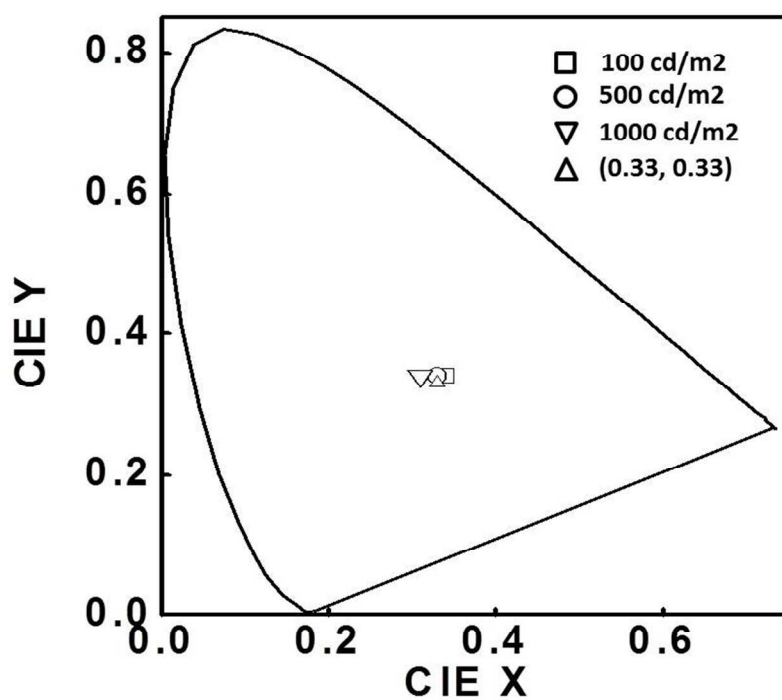

**Figure S6.** A typical CIE coordinate diagram used to compare the emission color of white-light stretchable PLED under different brightness.

**Supporting movie S1:** A stretchable white PLED with fairly uniform and bright light emission under stretching-releasing cycles with different strains at room temperature. The driving voltage is 14 V.
